# Supplementary material for: Exploratory analyses assessing the impact of early tumour shrinkage and depth of response on survival outcomes in patients with RAS wild-type metastatic colorectal cancer receiving treatment in three randomised panitumumab trials
Source: Springer Nature journal article supplement (doi:10.1007/s00432-017-2534-z), 2017-10-28

## Online supplementary material

**Table S1** Baseline demographics and disease characteristics, by depth of response category  
(a, PRIME; b, PEAK studies) (RAS wild-type population)

**a**

|                                 | DpR category               |                              |                                |                                |                                 |
|---------------------------------|----------------------------|------------------------------|--------------------------------|--------------------------------|---------------------------------|
|                                 | Group 1<br><0%<br>(n = 43) | Group 2<br>0–30%<br>(n = 83) | Group 3<br>31–52%<br>(n = 116) | Group 4<br>53–70%<br>(n = 104) | Group 5<br>71–100%<br>(n = 114) |
| Study treatment, n (%)          |                            |                              |                                |                                |                                 |
| Panitumumab + FOLFOX4           | 17 (39.5)                  | 40 (48.2)                    | 57 (49.1)                      | 53 (51.0)                      | 69 (60.5)                       |
| FOLFOX4 alone                   | 26 (60.5)                  | 43 (51.8)                    | 59 (50.9)                      | 51 (49.0)                      | 45 (39.5)                       |
| Male sex, n (%)                 | 23 (53.5)                  | 52 (62.7)                    | 71 (61.2)                      | 69 (66.3)                      | 80 (70.2)                       |
| Age, years – median (range)     | 60<br>(32–79)              | 62<br>(27–80)                | 61<br>(32–79)                  | 63<br>(37–82)                  | 59<br>(27–77)                   |
| ECOG PS 0/1, n (%)              | 40 (93.0)                  | 73 (88.0)                    | 108 (93.1)                     | 101 (97.1)                     | 113 (99.1)                      |
| Prior adjuvant therapy, n (%)   | 8 (18.6)                   | 21 (25.3)                    | 16 (13.8)                      | 16 (15.4)                      | 11 (9.6)                        |
| Primary tumour diagnosis, n (%) |                            |                              |                                |                                |                                 |
| Colon                           | 31 (72.1)                  | 54 (65.1)                    | 80 (69.0)                      | 55 (52.9)                      | 77 (67.5)                       |
| Rectum                          | 12 (27.9)                  | 29 (34.9)                    | 36 (31.0)                      | 49 (47.1)                      | 37 (32.5)                       |
| Side of disease, n (%)          |                            |                              |                                |                                |                                 |
| Left                            | 25 (58.1)                  | 45 (54.2)                    | 73 (62.9)                      | 79 (76.0)                      | 87 (76.3)                       |
| Right                           | 8 (18.6)                   | 23 (27.7)                    | 22 (19.0)                      | 11 (10.6)                      | 13 (11.4)                       |
| Unknown                         | 10 (23.3)                  | 15 (18.1)                    | 21 (18.1)                      | 14 (13.5)                      | 14 (12.3)                       |
| BRAF status, n (%)              |                            |                              |                                |                                |                                 |
| Mutant                          | 14 (32.6)                  | 18 (21.7)                    | 11 (9.5)                       | 3 (2.9)                        | 2 (1.8)                         |
| Wild-type                       | 29 (67.4)                  | 63 (75.9)                    | 102 (87.9)                     | 98 (94.2)                      | 108 (94.7)                      |
| Unknown                         | 0 (0.0)                    | 2 (2.4)                      | 3 (2.6)                        | 3 (2.9)                        | 4 (3.5)                         |
| Sites of metastases, n (%)      |                            |                              |                                |                                |                                 |
| Liver only                      | 5 (11.6)                   | 4 (4.8)                      | 17 (14.7)                      | 15 (14.4)                      | 44 (38.6)                       |
| Liver + other                   | 31 (72.1)                  | 56 (67.5)                    | 86 (74.1)                      | 74 (71.2)                      | 66 (57.9)                       |
| Other only                      | 7 (16.3)                   | 23 (27.7)                    | 13 (11.2)                      | 15 (14.4)                      | 4 (3.5)                         |

DpR depth of response, ECOG PS Eastern Cooperative Oncology Group performance status

**b**

|                                 | DpR category              |                              |                               |                               |                                |
|---------------------------------|---------------------------|------------------------------|-------------------------------|-------------------------------|--------------------------------|
|                                 | Group 1<br><0%<br>(n = 3) | Group 2<br>0–30%<br>(n = 33) | Group 3<br>31–53%<br>(n = 41) | Group 4<br>54–82%<br>(n = 40) | Group 5<br>83–100%<br>(n = 41) |
| Study treatment, n (%)          |                           |                              |                               |                               |                                |
| Panitumumab + mFOLFOX6          | 3 (100.0)                 | 13 (39.4)                    | 13 (31.7)                     | 27 (67.5)                     | 27 (65.9)                      |
| Bevacizumab + mFOLFOX6          | 0 (0.0)                   | 20 (60.6)                    | 28 (68.3)                     | 13 (32.5)                     | 14 (34.1)                      |
| Male sex, n (%)                 | 2 (66.7)                  | 24 (72.7)                    | 29 (70.7)                     | 27 (67.5)                     | 24 (58.5)                      |
| Age, years – median (range)     | 59<br>(59–60)             | 63<br>(48–77)                | 62<br>(41–79)                 | 61<br>(42–82)                 | 58<br>(23–75)                  |
| ECOG PS 0/1, n (%)              | 3 (100.0)                 | 33 (100.0)                   | 41 (100.0)                    | 40 (100)                      | 41 (100)                       |
| Prior adjuvant therapy, n (%)   | 0 (0.0)                   | 12 (36.4)                    | 8 (19.4)                      | 2 (5.0)                       | 7 (17.1)                       |
| Primary tumour diagnosis, n (%) |                           |                              |                               |                               |                                |
| Colon                           | 1 (33.3)                  | 23 (69.7)                    | 28 (68.3)                     | 30 (75.0)                     | 28 (68.3)                      |
| Rectum                          | 2 (66.7)                  | 10 (30.3)                    | 13 (31.7)                     | 10 (25.0)                     | 13 (31.7)                      |
| Side of disease, n (%)          |                           |                              |                               |                               |                                |
| Left                            | 2 (66.7)                  | 22 (66.7)                    | 21 (51.2)                     | 25 (62.5)                     | 33 (80.5)                      |
| Right                           | 1 (33.3)                  | 9 (27.3)                     | 10 (24.4)                     | 7 (17.5)                      | 5 (12.2)                       |
| Unknown                         | 0 (0.0)                   | 2 (6.1)                      | 10 (24.4)                     | 8 (20.0)                      | 3 (7.3)                        |
| <i>BRAF</i> status, n (%)       |                           |                              |                               |                               |                                |
| Mutant                          | 1 (33.3)                  | 4 (12.1)                     | 0 (0.0)                       | 7 (17.5)                      | 1 (2.4)                        |
| Wild-type                       | 2 (66.7)                  | 29 (87.9)                    | 41 (100.0)                    | 33 (82.5)                     | 40 (97.6)                      |
| Unknown                         | -                         | -                            | -                             | -                             | -                              |
| Sites of metastases, n (%)      |                           |                              |                               |                               |                                |
| Liver only                      | 1 (33.3)                  | 7 (21.2)                     | 7 (17.1)                      | 9 (22.5)                      | 19 (46.3)                      |
| Liver + other                   | 1 (33.3)                  | 11 (33.3)                    | 19 (46.3)                     | 23 (57.5)                     | 15 (36.6)                      |
| Other only                      | 1 (33.3)                  | 15 (45.5)                    | 15 (36.6)                     | 8 (20.0)                      | 7 (17.1)                       |

DpR depth of response, ECOG PS Eastern Cooperative Oncology Group performance status

**Fig. S1** Waterfall plots showing distribution of depth of response by overall survival status (blue bars: survived  $\geq 24$  months; red bars: survived  $< 24$  months) in patients receiving panitumumab plus FOLFOX or comparator treatment (**a**, PRIME; **b** PEAK studies) (*RAS* wild-type population)

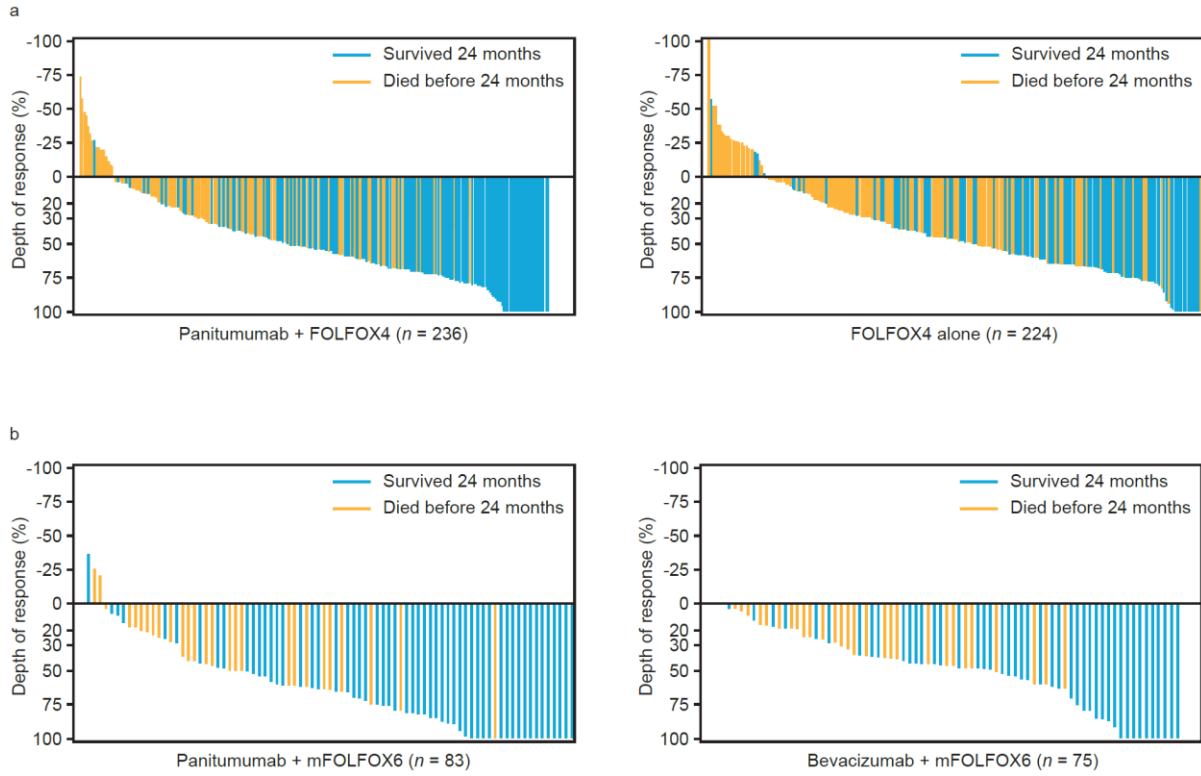

Supplement: MOESM1 [file 15173544]
